# Supplementary material
Source: publisher figshare collection journal article supplement (https://acs.figshare.com/ndownloader/files/5179030)
Supplement: Supplementary file 1 [file 5179030]

**Supporting Information**  
**Proton-Coupled Electron Transfer in Soybean Lipoxygenase**

Elizabeth Hatcher, Alexander V. Soudackov, and Sharon Hammes-Schiffer\*

*Department of Chemistry, 152 Davey Laboratory, Pennsylvania State University,  
University Park, Pennsylvania, 16802 USA; e-mail: shs@chem.psu.edu*

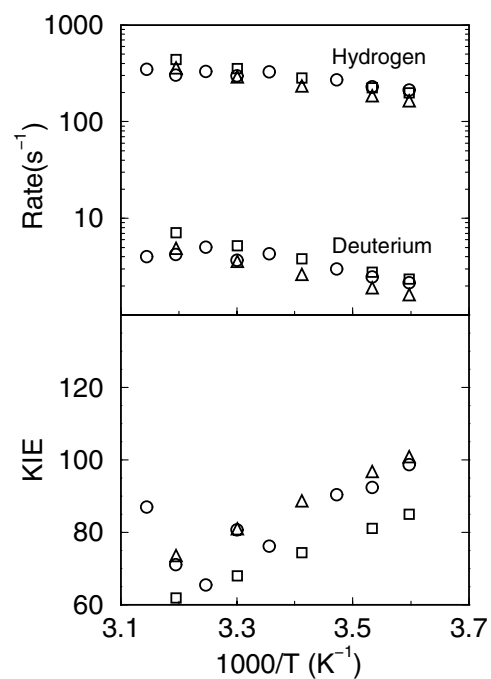

**Figure S1:** Temperature dependence of the rates and KIEs for multistate continuum theory calculations with a quantum treatment of the proton donor-acceptor vibrational motion. The experimental data are denoted with circles. The theoretical results were generated with two different parameter sets: the original parameter set used to generate Figure 5 (squares) and the same parameters except that the couplings were slightly modified so that these quantum results reproduced the experimental rate and KIE at 303 K (triangles).

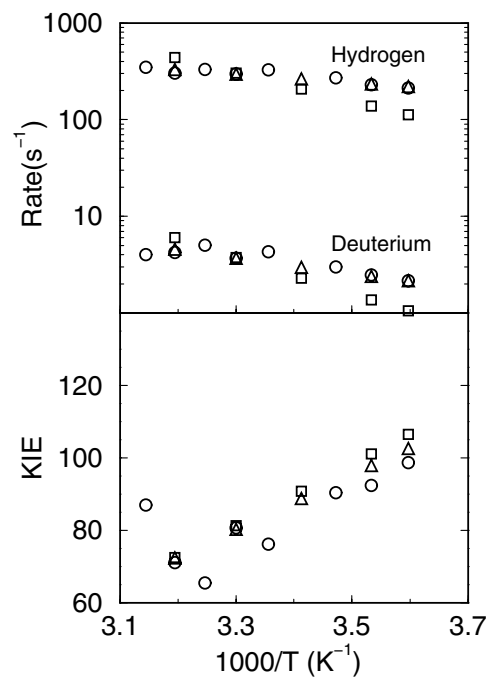

**Figure S2:** Temperature dependence of the rates and KIEs for multistate continuum theory calculations with a classical treatment of the proton donor-acceptor vibrational motion. The experimental data are denoted with circles. The theoretical calculations use the original parameter set with the inner-sphere reorganization energy modified to be  $\lambda_{\text{in}} = 10$  kcal/mol (triangles) and  $\lambda_{\text{in}} = 30$  kcal/mol (squares). The equilibrium C--O distance and frequency are  $R_1^0 = 2.88$  Å and  $\omega_1^0 = 511$  cm<sup>-1</sup> and the dominant C--O distance is  $R_{\text{dom}} = 2.69$  Å.

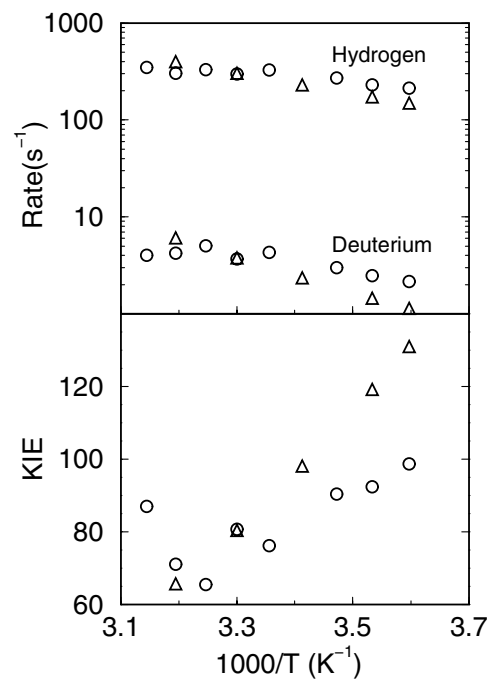

**Figure S3:** Temperature dependence of the rates and KIEs for multistate continuum theory calculations with a classical treatment of the proton donor-acceptor vibrational motion. The experimental data are denoted with circles. The theoretical calculations use the original parameter set with the C--O Morse parameter  $R_{\text{CO}}^{\circ}$  modified to be  $R_{\text{CO}}^{\circ} = 3.0$  Å (triangles). In all cases, the couplings  $V^{\text{ET}}$  and  $V^{\text{PT}}$  were fit to the experimental rate and KIE at  $T=303$  K. The equilibrium C--O distance and frequency are  $R_{\text{I}}^{\circ} = 3.02$  Å and  $\omega_{\text{I}}^{\circ} = 519$  cm<sup>-1</sup> and the dominant C--O distance is  $R_{\text{dom}} = 2.79$  Å.

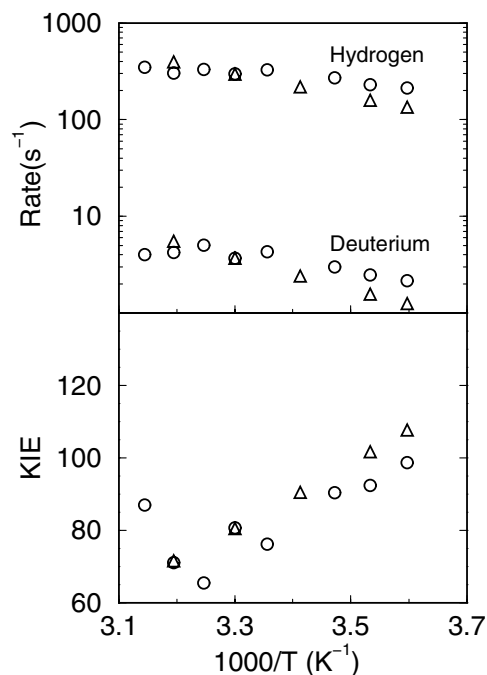

**Figure S4:** Temperature dependence of the rates and KIEs for multistate continuum theory calculations with a classical treatment of the proton donor-acceptor vibrational motion. The experimental data are denoted with circles, and the theoretical results are denoted with triangles. The calculations use the original parameter set with the following modifications: the solvent reorganization energies are calculated for a conformation with a C--O distance of 3.0 Å,  $R_{\text{CO}}^0 = 3.0$  Å,  $\beta_{\text{CO}} = 1.8$  Å<sup>-1</sup> corresponding to a C--O Morse frequency of 299 cm<sup>-1</sup>, Fe--O force constant of 25 kcal mol<sup>-1</sup> Å<sup>-2</sup>,  $\pi$ -C force constant of 100 kcal mol<sup>-1</sup> Å<sup>-2</sup>, and the couplings  $V^{\text{ET}}$  and  $V^{\text{PT}}$  were fit to the experimental rate and KIE at T=303 K. The equilibrium C--O distance and frequency are  $R_1^0 = 3.05$  Å and  $\omega_1^0 = 284$  cm<sup>-1</sup> and the dominant C--O distance is  $R_{\text{dom}} = 2.69$  Å.

|                                                                       | $E_{\text{act}}^{\text{H}}$ | $E_{\text{act}}^{\text{D}}$ |
|-----------------------------------------------------------------------|-----------------------------|-----------------------------|
| Experiment                                                            | 2.1                         | 3.0                         |
| Original parameters                                                   | 4.1                         | 5.9                         |
| Fixed $R$ , $R = 2.7 \text{ \AA}$                                     | 2.6                         | 3.9                         |
| Fixed $R$ , $R = 2.8 \text{ \AA}$                                     | 3.0                         | 6.0                         |
| Quantum $R$ w/<br>original parameters                                 | 3.9                         | 5.4                         |
| Quantum $R$ w/<br>adjusted couplings                                  | 3.9                         | 5.4                         |
| Original parameters<br>w/ $\lambda_{\text{in}} = 10 \text{ kcal/mol}$ | 2.0                         | 3.7                         |
| Original parameters<br>w/ $\lambda_{\text{in}} = 30 \text{ kcal/mol}$ | 6.7                         | 8.6                         |
| Original parameters<br>w/ $R_{\text{CO}}^{\circ} = 3.0 \text{ \AA}$   | 4.8                         | 8.2                         |
| Alternative model                                                     | 5.3                         | 7.3                         |

**Table S1:** The slope of the plots in the figures illustrating the temperature dependence of the rates, where the slope is the activation energy  $E_{\text{act}}$  defined from the empirical Arrhenius equation  $k = A \exp^{-E_{\text{act}}/RT}$ . The activation energies are given in units of kcal/mol. The experimental data is from Ref. 12. The data for the original parameters are given in Figure 5, and the data for the fixed proton donor-acceptor distances  $R$  are given in Figure 8. The data with the quantum mechanical treatment of  $R$  are given in Figure S1, the data with the different inner-sphere reorganization energies are given in Figure S2, the data with the different value of  $R_{\text{CO}}^{\circ}$  are given in Figure S3, and the data for the alternative model are given in Figure S4.
